# Supplementary material
Source: Royal Society of Chemistry journal article supplement (doi:10.1039/d6cp00426a)
Supplement: d6cp00426a1.pdf [file d6cp00426a1.pdf]

## SUPPLEMENTARY MATERIAL

### GAEAM: A New Package for Optimizing the Embedded Atom Method

#### Potentials of Solids by using the Genetic Algorithm

Yang-Yang Zhang,<sup>a,b\*</sup> Yu Cheng,<sup>a,b</sup> Shu-Wen Zhang<sup>a,b</sup>

<sup>a</sup> Fundamental Science Center of Rare Earths, Ganjiang Innovation Academy, Chinese Academy of Sciences, Ganzhou, 341000 Jiangxi, China

<sup>b</sup> School of Rare Earths, University of Science and technology of China, Hefei 230026, China

\* Corresponding author: yyzhang@gia.cas.cn

### Table of Contents

|                                                                   |     |
|-------------------------------------------------------------------|-----|
| <b>Part A.</b> SI for the “Computational details”                 | S2  |
| <b>Part B.</b> Evolution of total energy                          | S4  |
| <b>Part C.</b> Evolution of fitness                               | S9  |
| <b>Part D.</b> Cartesian coordinates of selected solids           | S19 |
| <b>Part E.</b> Complete user guide for the usage of GAEAM package | S31 |
| <b>Part F.</b> Optimized parameters for EAM potentials            | S32 |
| <b>Part G.</b> Reported parameters for EAM potentials             | S34 |

## Part A. SI for the “Computational details”

```
9 def makeFunc(a, b, r_e, c):
10     # Creates functions of the form used for density function.
11     # Functional form also forms components of pair potential.
12     def func(r):
13         return (a * math.exp(-b*(r/r_e - 1)))/(1+(r/r_e - c)**20.0)
14     return func
15
16 def makePairPotAA(A, gamma, r_e, kappa,
17                 B, omega, lamda):
18     # Function factory that returns functions parameterised for homogeneous pair interactions
19     f1 = makeFunc(A, gamma, r_e, kappa)
20     f2 = makeFunc(B, omega, r_e, lamda)
21
22     def func(r):
23         return f1(r) - f2(r)
24     return func
25
26 def makePairPotAB(dens_a, phi_aa, dens_b, phi_bb):
27     # Function factory that returns functions parameterised for heterogeneous pair interactions
28     def func(r):
29         return 0.5 * ((dens_b(r)/dens_a(r) * phi_aa(r)) + (dens_a(r)/dens_b(r) * phi_bb(r)))
30     return func
31
32 def makeEmbed(rho_e, rho_s, F_ni, F_i, F_e, eta):
33     # Function factory returning parameterised embedding function.
34     rho_n = 0.85*rho_e
35     rho_0 = 1.15*rho_e
36
37     def e1(rho):
38         return sum([F_ni[i] * (rho/rho_n - 1)**float(i) for i in range(4)])
39
54 class GeneticAlgorithm:
55     """Genetic Algorithm for global optimization of multiple parameters"""
56
57     def __init__(self, objective_func, param_ranges, pop_size=50, generations=100,
58                mutation_rate=0.01, crossover_rate=0.8, elitism_ratio=0.1):
59         """
60         Initialize genetic algorithm parameters
61
62         Parameters:
63         objective_func: Objective function, takes a list of parameters and returns a fitness value
64         param_ranges: List of parameter ranges, each element is a tuple (min, max, is_integer)
65                       is_integer=True means the parameter is an integer, False means floating-point number
66         pop_size: Population size
67         generations: Number of evolutionary generations
68         mutation_rate: Mutation probability
69         crossover_rate: Crossover probability
70         elitism_ratio: Elitism retention ratio
71         """
72         self.objective_func = objective_func
73         self.param_ranges = param_ranges
74         self.num_params = len(param_ranges)
75         self.pop_size = pop_size
76         self.generations = generations
77         self.mutation_rate = mutation_rate
78         self.crossover_rate = crossover_rate
79         self.elitism_size = int(elitism_ratio * pop_size)
80
81         # Initialize population
82         self.population = self.initialize_population()
83
```

**Figure S1.** Selected dominant codes for achieving the GAEAM method developed in this work written in the Python (v3.15) languages interfaced with the LAMMPS (19 Nov 2024) package.

```

88     def initialize_population(self):
89         """Initialize population"""
90         population = []
91         for _ in range(self.pop_size):
92             individual = []
93             for (min_val, max_val, is_integer) in self.param_ranges:
94                 if is_integer:
95                     gene = random.randint(min_val, max_val)
96                 else:
97                     gene = random.uniform(min_val, max_val)
98                 individual.append(gene)
99             population.append(individual)
100        return population
101
102     def calculate_fitness(self, individual):
103         """Calculate fitness of an individual"""
104         return self.objective_func(individual)
105
106     def select_parents(self, fitness_scores):
107         """Roulette wheel selection for parent individuals"""
108         # Ensure fitness scores are positive (adjust if the goal is minimization)
109         min_fitness = min(fitness_scores)
110         if min_fitness < 0:
111             adjusted_scores = [score - min_fitness + 1e-6 for score in fitness_scores]
112         else:
113             adjusted_scores = fitness_scores
114
115         total_fitness = sum(adjusted_scores)
116         probabilities = [score / total_fitness for score in adjusted_scores]
117
118         # Select two different parents
119         parent1_idx = np.random.choice(self.pop_size, p=probabilities)
120         parent2_idx = np.random.choice(self.pop_size, p=probabilities)
121
122     def crossover(self, parent1, parent2):
123         """Single-point crossover to generate offspring"""
124         if random.random() < self.crossover_rate:
125             # Randomly select crossover point
126             crossover_point = random.randint(1, self.num_params - 1)
127             child1 = parent1[:crossover_point] + parent2[crossover_point:]
128             child2 = parent2[:crossover_point] + parent1[crossover_point:]
129             return child1, child2
130         else:
131             return parent1.copy(), parent2.copy()
132
133     def mutate(self, individual):
134         """Perform mutation on an individual"""
135         mutated_individual = individual.copy()
136
137         for i in range(self.num_params):
138             if random.random() < self.mutation_rate:
139                 min_val, max_val, is_integer = self.param_ranges[i]
140                 if is_integer:
141                     mutated_individual[i] = random.randint(min_val, max_val)
142                 else:
143                     # Gaussian mutation centered on current value, within parameter range
144                     mean = mutated_individual[i]
145                     std = (max_val - min_val) / 10 # Standard deviation is 1/10 of the range
146                     new_val = random.gauss(mean, std)
147                     # Ensure value is within range
148                     new_val = max(min_val, min(new_val, max_val))
149                     mutated_individual[i] = new_val
150
151         return mutated_individual

```

**Figure S2.** Selected dominant codes for achieving the GAEAM method developed in this work written in the Python (v3.15) languages interfaced with the LAMMPS (19 Nov 2024) package.

## Part B. Evolution of total energy

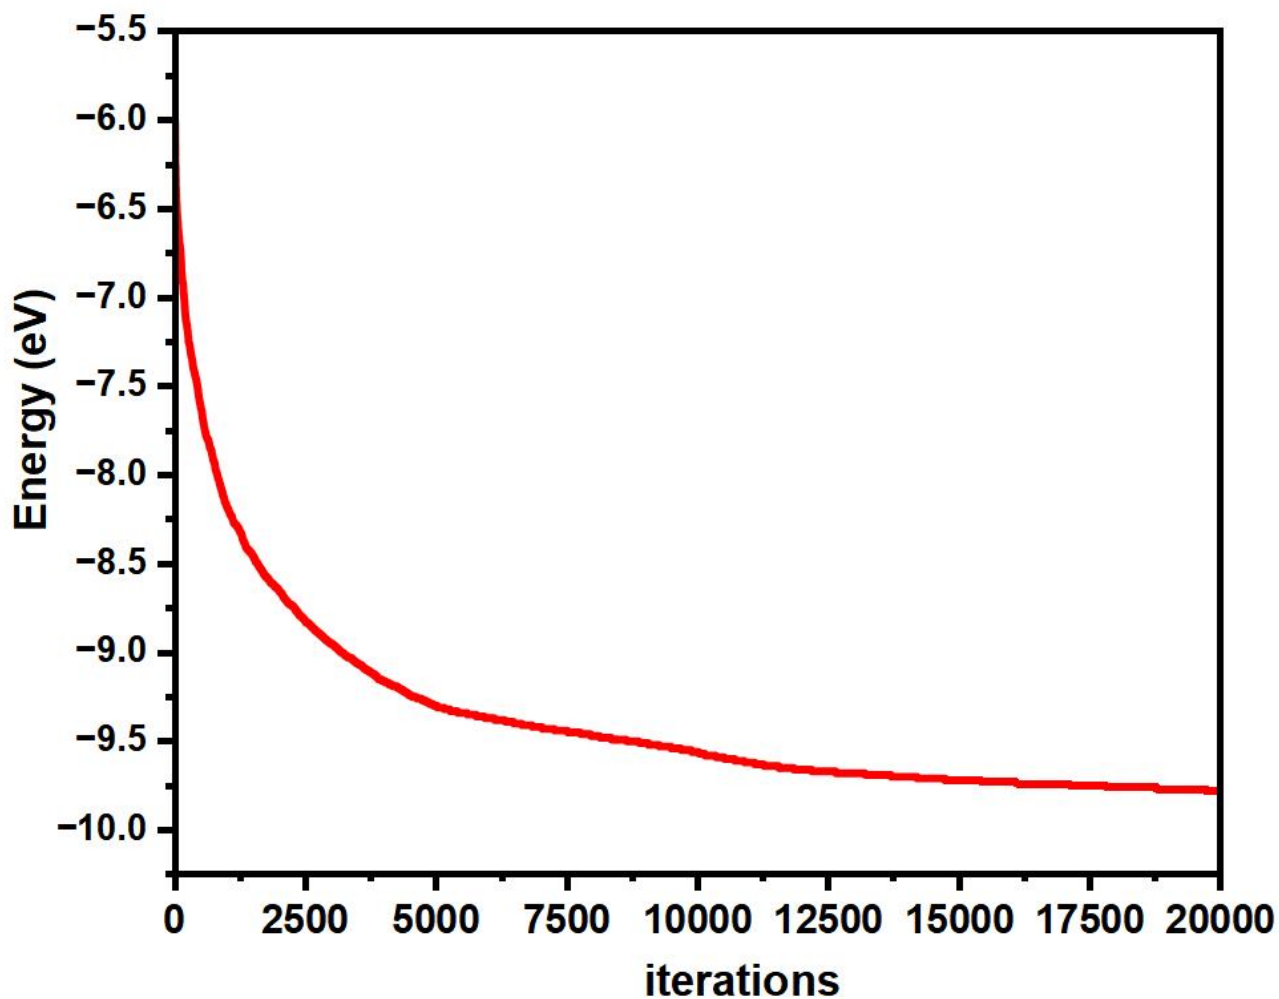

**Figure S3.** Evolution of total energy (in eV) of Al-Cu alloys optimized by using the GAEAM package and improved genetic algorithm developed in this work interfaced with the LAMMPS (19 Nov 2024) package.

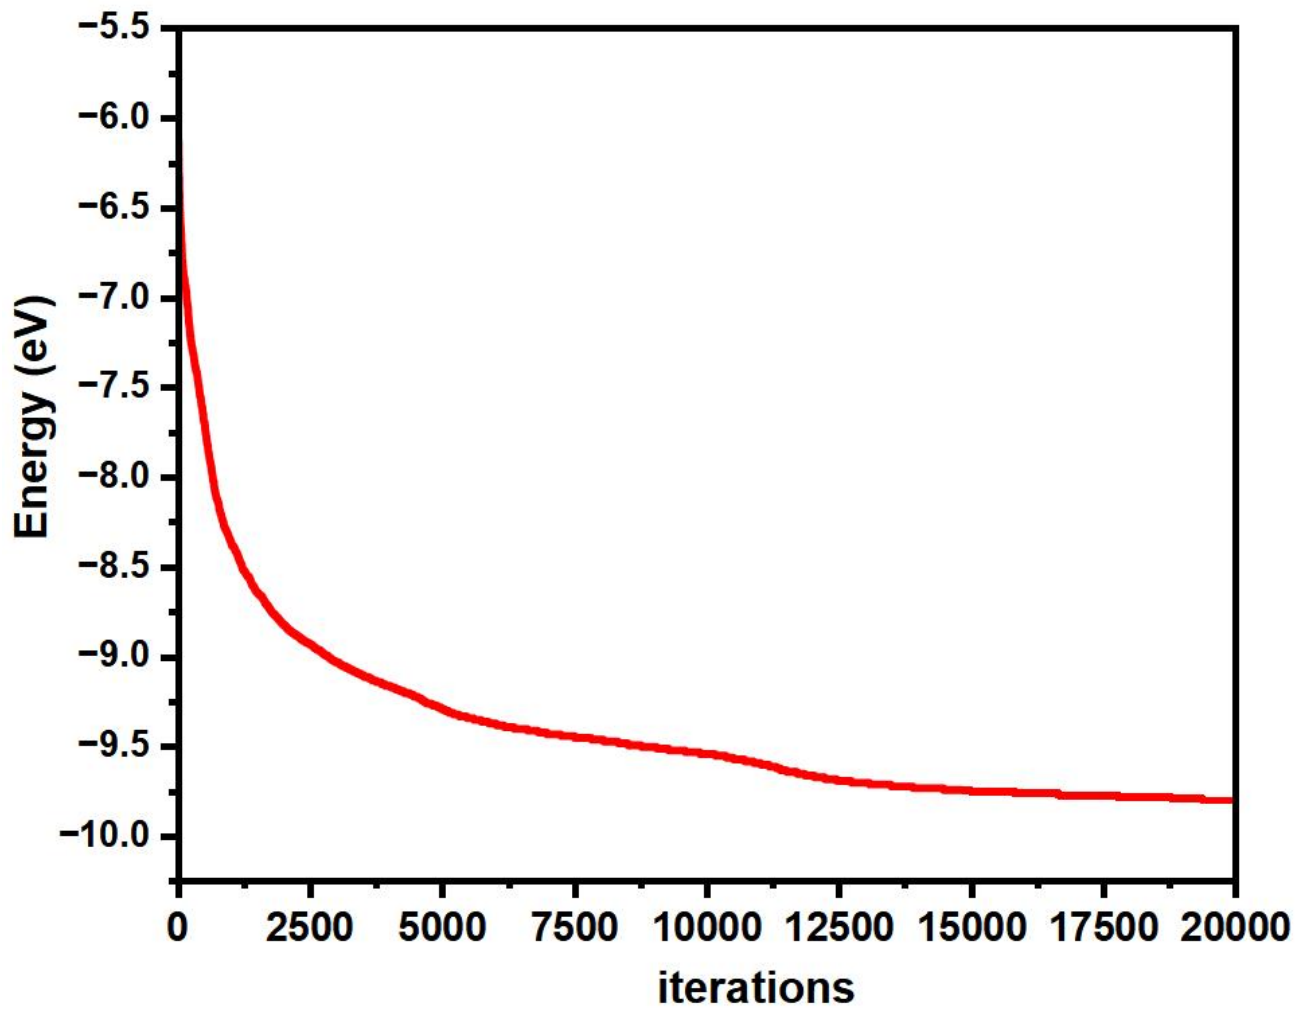

**Figure S4.** Evolution of total energy (in eV) of Al-Sm alloys optimized by using the GAEAM package and improved genetic algorithm developed in this work interfaced with the LAMMPS (19 Nov 2024) package.

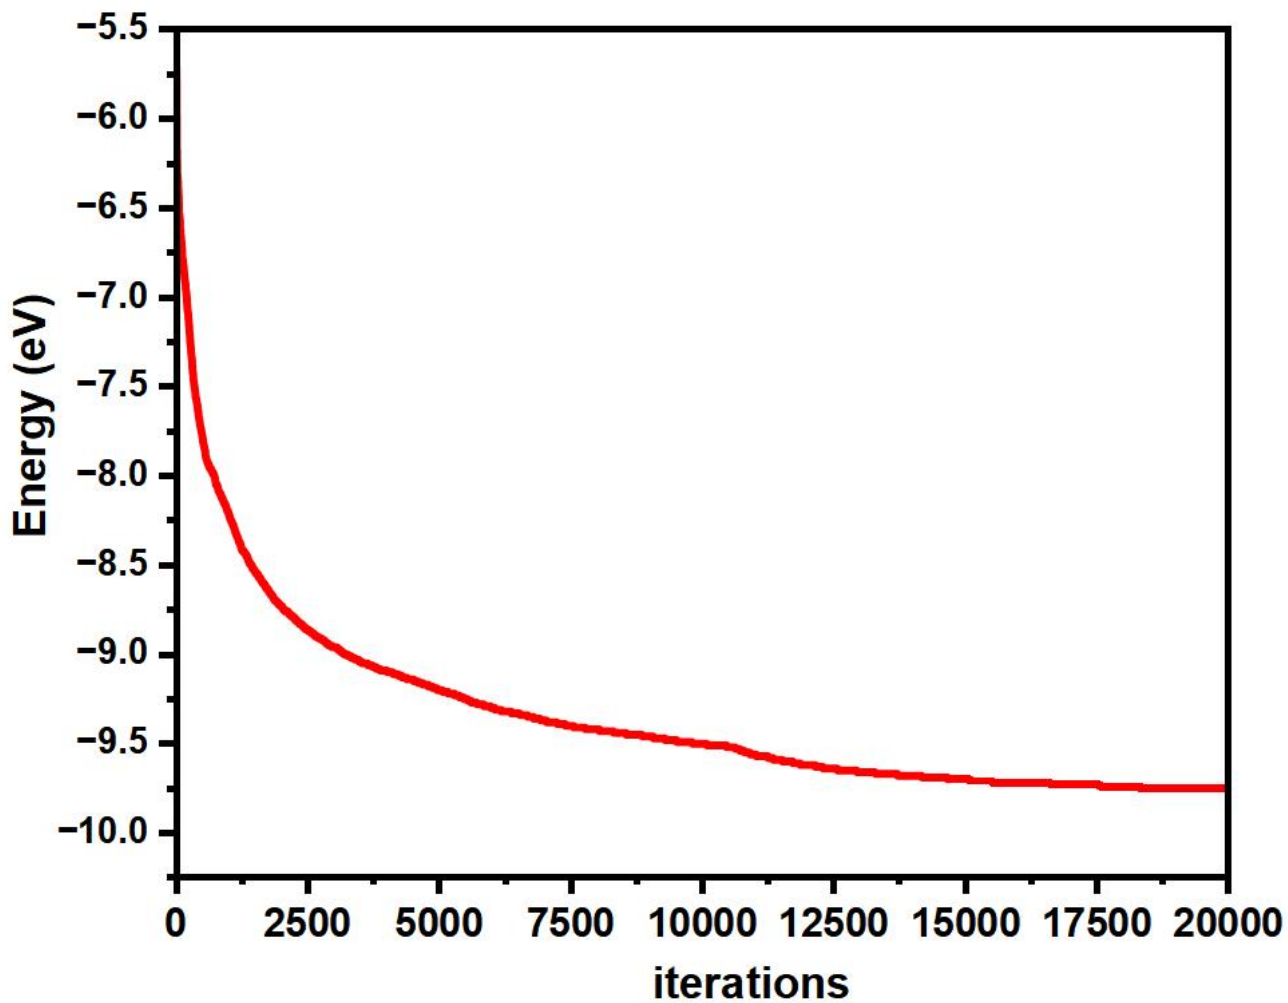

**Figure S5.** Evolution of total energy (in eV) of Mg-Nd alloys optimized by using the GAEAM package and improved genetic algorithm developed in this work interfaced with the LAMMPS (19 Nov 2024) package.

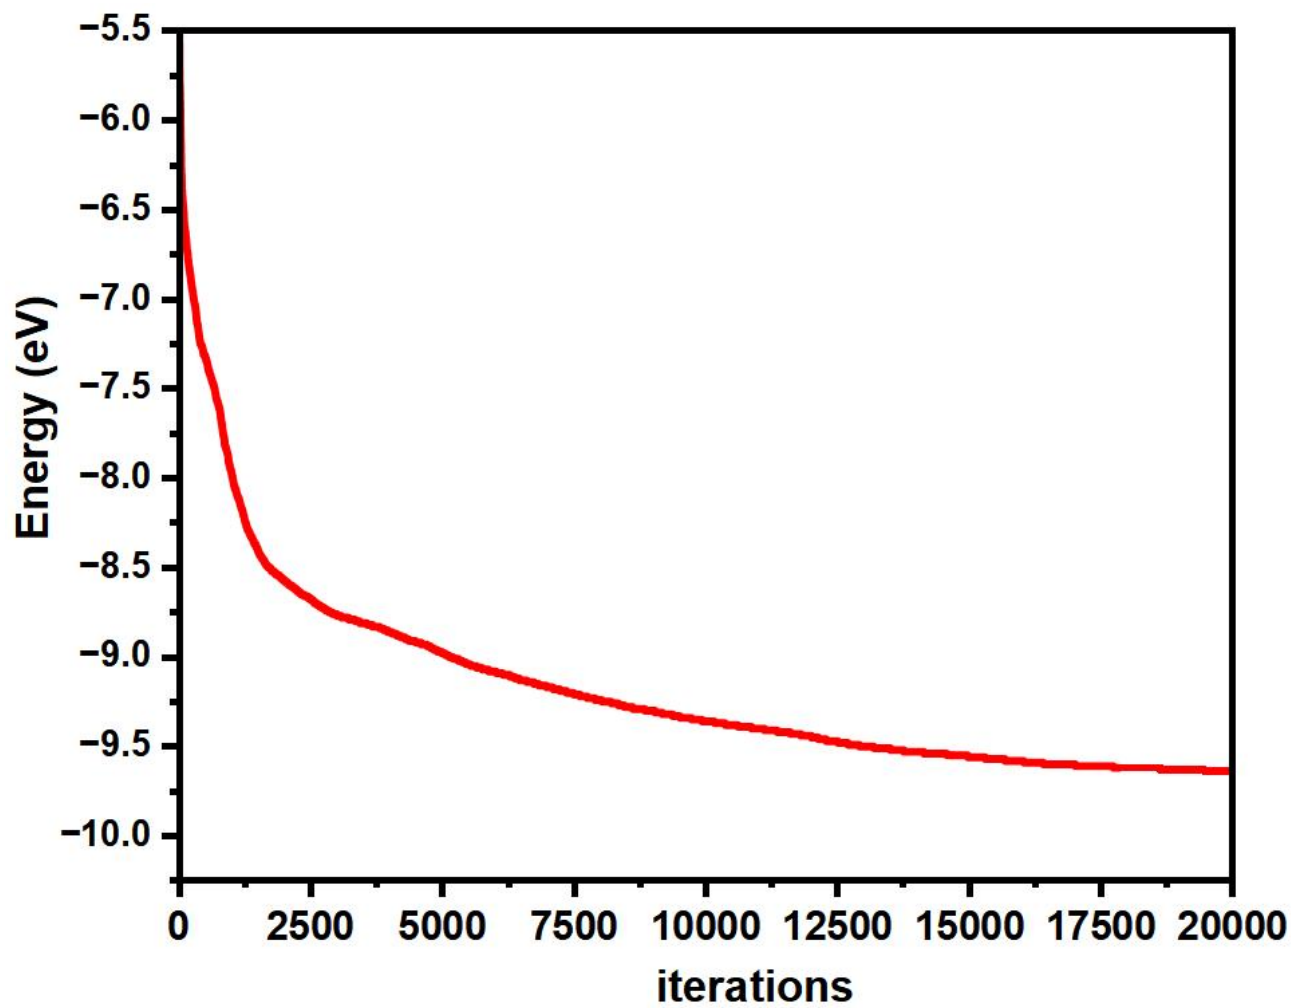

**Figure S6.** Evolution of total energy (in eV) of Sc-Al alloys optimized by using the GAEAM package and improved genetic algorithm developed in this work interfaced with the LAMMPS (19 Nov 2024) package.

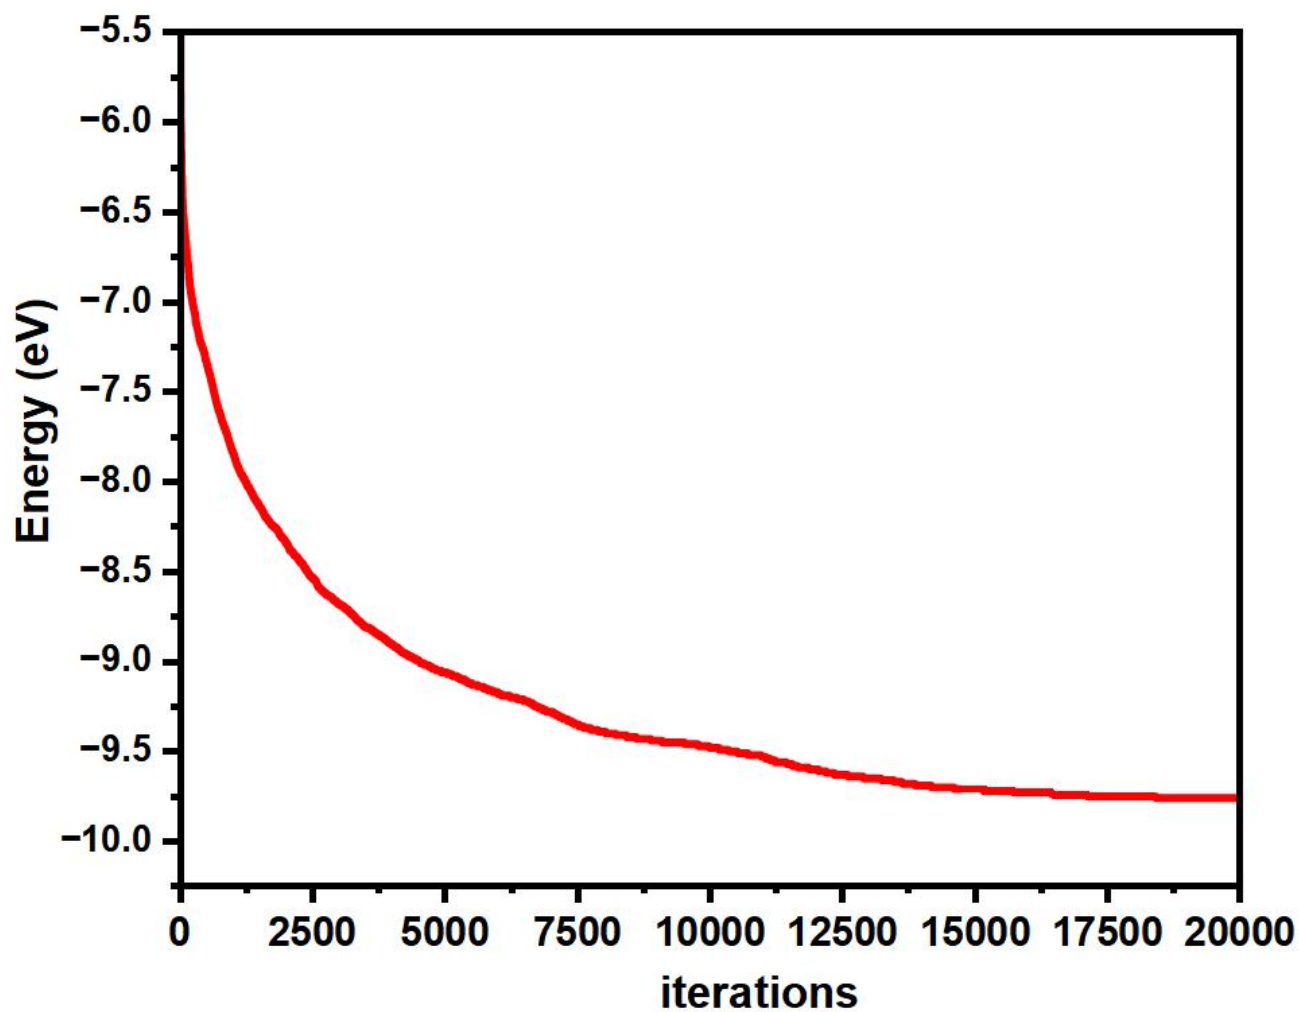

**Figure S7.** Evolution of total energy (in eV) of Sm-Co alloys optimized by using the GAEAM package and improved genetic algorithm developed in this work interfaced with the LAMMPS (19 Nov 2024) package.

### Part C. Evolution of fitness

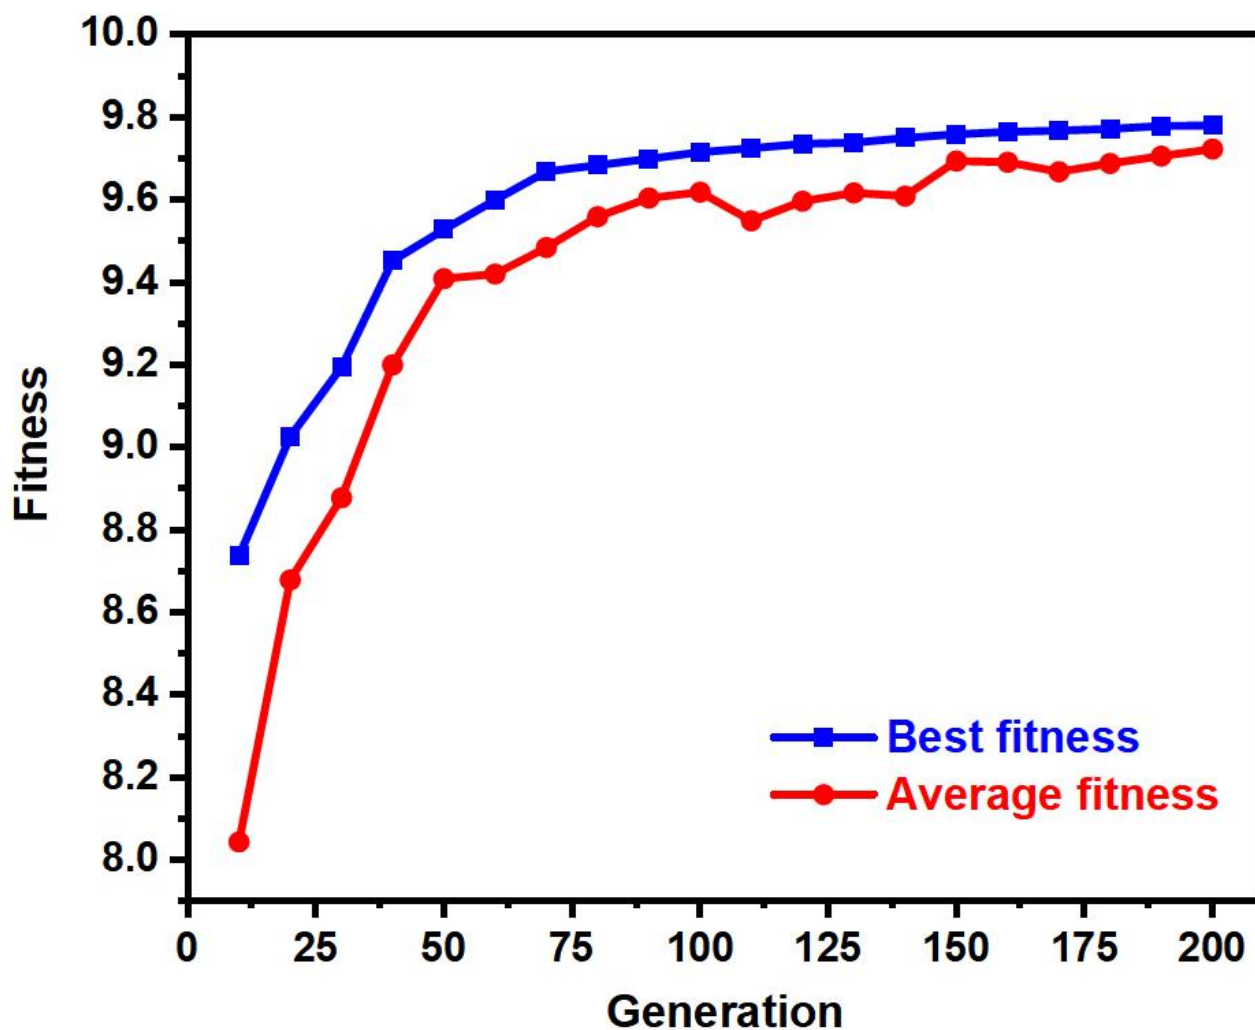

**Figure S8.** Evolution of best fitness (in blue) and average fitness (in red) in each generation of Al-Cu alloys optimized by using the GAEAM package and improved genetic algorithm developed in this work interfaced with the LAMMPS (19 Nov 2024) package.

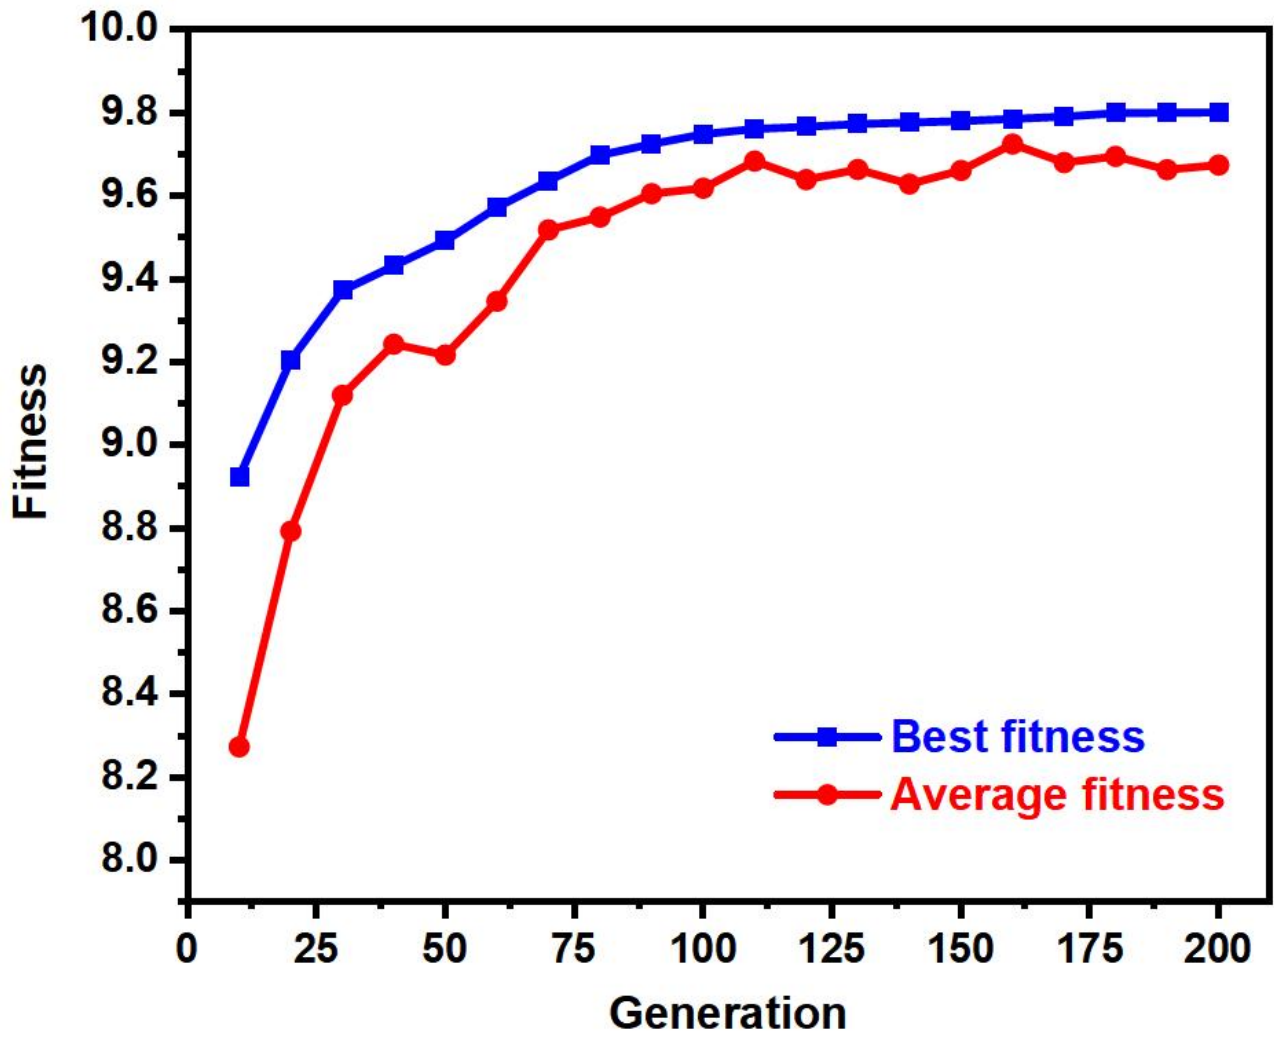

**Figure S9.** Evolution of best fitness (in blue) and average fitness (in red) in each generation of Al-Sm alloys optimized by using the GAEAM package and improved genetic algorithm developed in this work interfaced with the LAMMPS (19 Nov 2024) package.

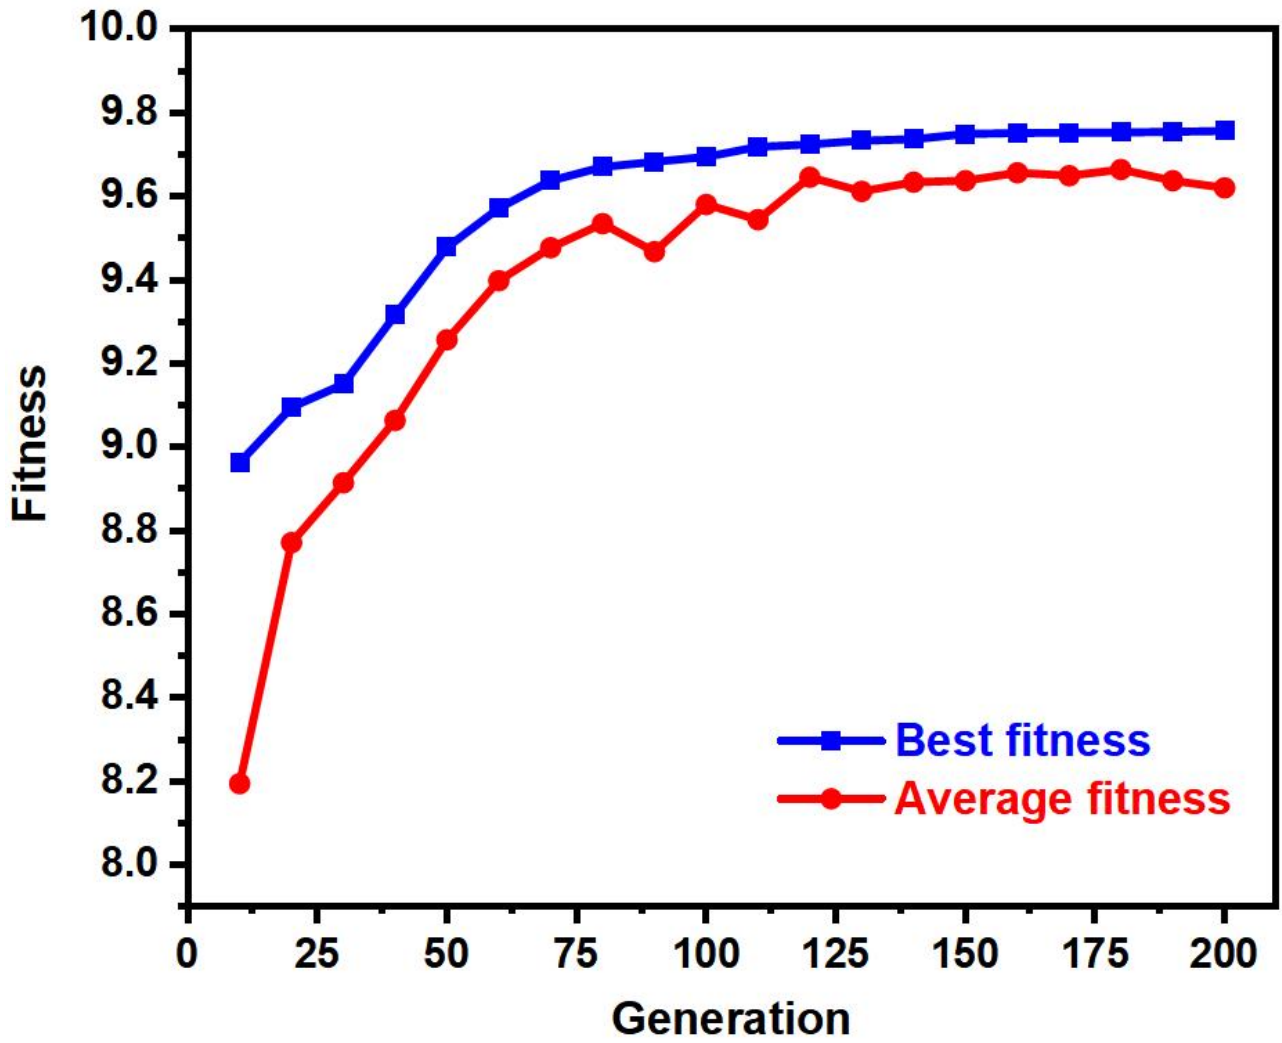

**Figure S10.** Evolution of best fitness (in blue) and average fitness (in red) in each generation of Mg-Nd alloys optimized by using the GAEAM package and improved genetic algorithm developed in this work interfaced with the LAMMPS (19 Nov 2024) package.

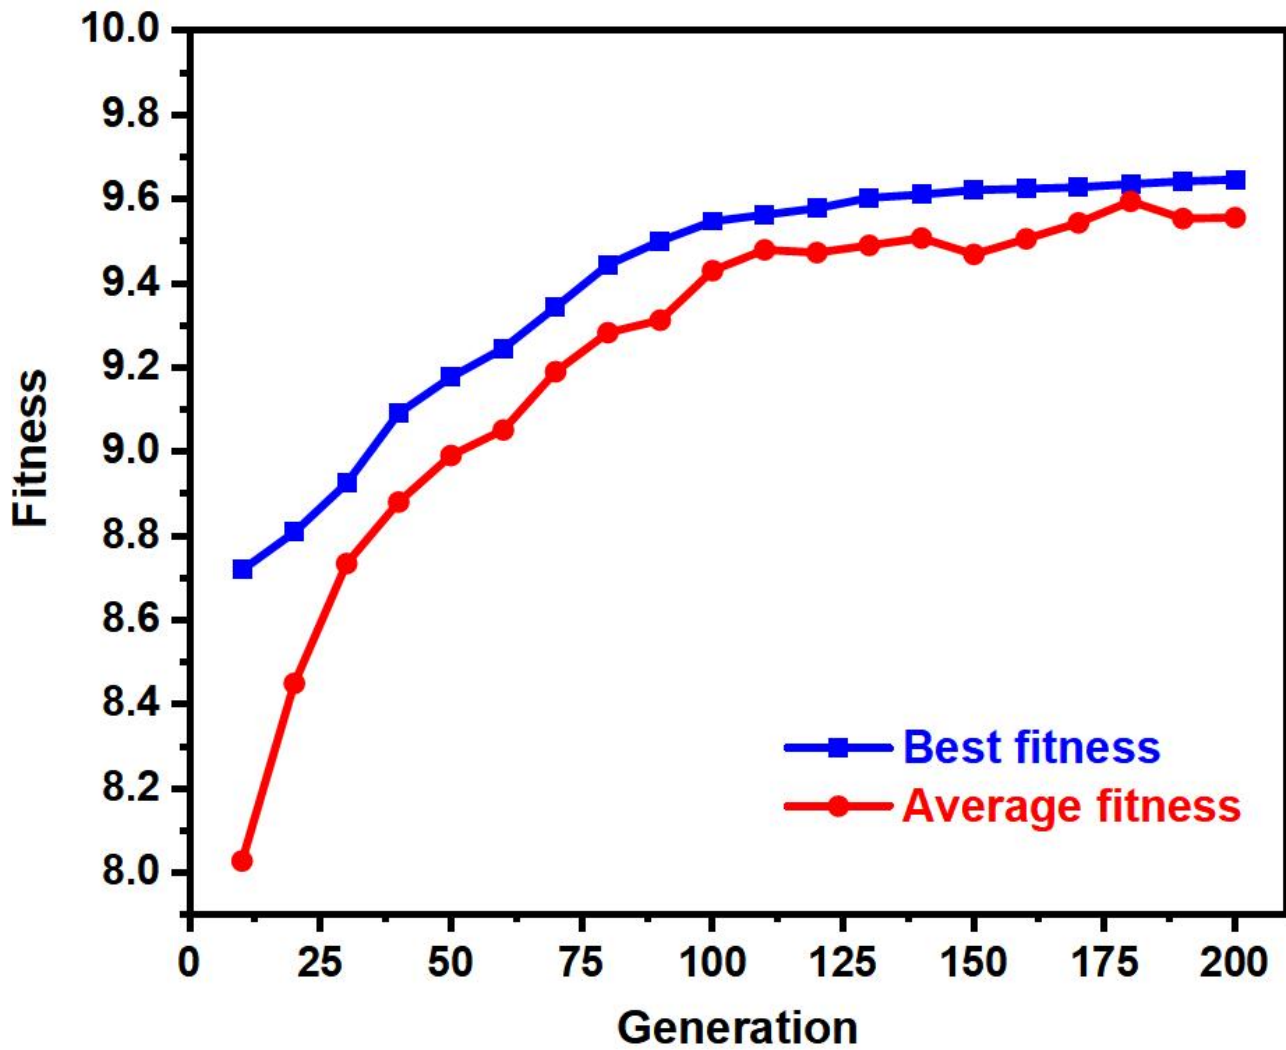

**Figure S11.** Evolution of best fitness (in blue) and average fitness (in red) in each generation of Sc-Al alloys optimized by using the GAEAM package and improved genetic algorithm developed in this work interfaced with the LAMMPS (19 Nov 2024) package.

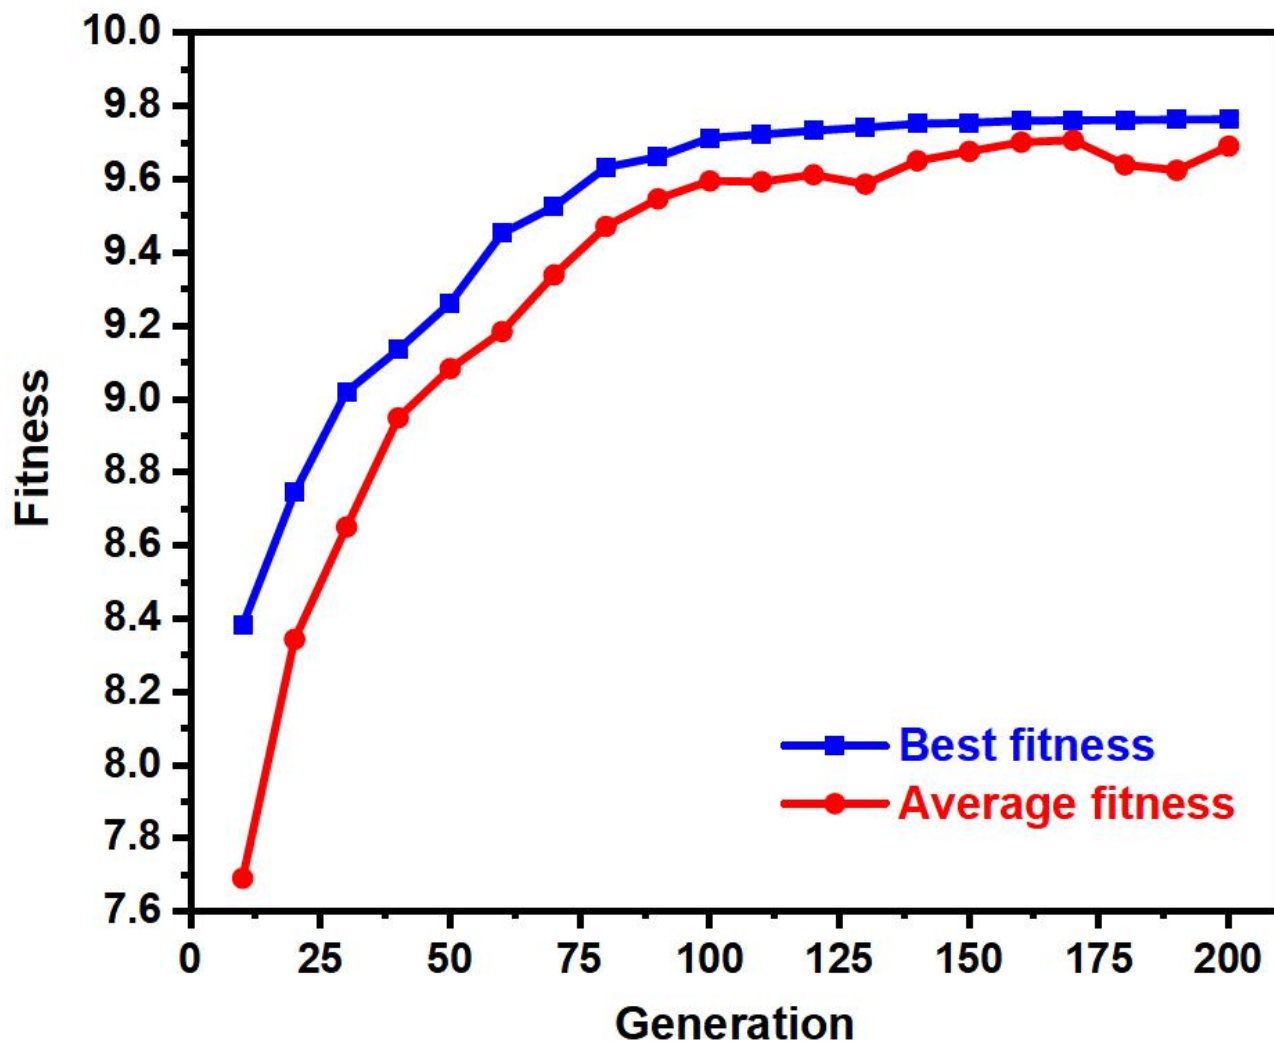

**Figure S12.** Evolution of best fitness (in blue) and average fitness (in red) in each generation of Sm-Co alloys optimized by using the GAEAM package and improved genetic algorithm developed in this work interfaced with the LAMMPS (19 Nov 2024) package.

**Table S1.** Evolution of best fitness and average fitness (in eV) in each generation of Al-Cu alloys optimized by using the GAEAM package and improved genetic algorithm developed in this work interfaced with the LAMMPS (19 Nov 2024) package.

| Generation | Best fitness | Average fitness |
|------------|--------------|-----------------|
| 10         | 8.7358       | 8.0435          |
| 20         | 9.0258       | 8.6782          |
| 30         | 9.1944       | 8.8778          |
| 40         | 9.4524       | 9.1993          |
| 50         | 9.5276       | 9.4087          |
| 60         | 9.5992       | 9.4201          |
| 70         | 9.6684       | 9.4840          |
| 80         | 9.6836       | 9.5590          |
| 90         | 9.6994       | 9.6042          |
| 100        | 9.7152       | 9.6185          |
| 110        | 9.7246       | 9.5489          |
| 120        | 9.7353       | 9.5963          |
| 130        | 9.7386       | 9.6170          |
| 140        | 9.7496       | 9.6090          |
| 150        | 9.7585       | 9.6940          |
| 160        | 9.7647       | 9.6908          |
| 170        | 9.7675       | 9.6681          |
| 180        | 9.7717       | 9.6883          |
| 190        | 9.7790       | 9.7057          |
| 200        | 9.7799       | 9.7233          |

**Table S2.** Evolution of best fitness and average fitness (in eV) in each generation of Al-Sm alloys optimized by using the GAEAM package and improved genetic algorithm developed in this work interfaced with the LAMMPS (19 Nov 2024) package.

| Generation | Best fitness | Average fitness |
|------------|--------------|-----------------|
| 10         | 8.9231       | 8.2734          |
| 20         | 9.2048       | 8.7925          |
| 30         | 9.3717       | 9.1200          |
| 40         | 9.4315       | 9.2432          |
| 50         | 9.4912       | 9.2166          |
| 60         | 9.5723       | 9.3461          |
| 70         | 9.6364       | 9.5183          |
| 80         | 9.6981       | 9.5489          |
| 90         | 9.7249       | 9.6053          |
| 100        | 9.7485       | 9.6186          |
| 110        | 9.7614       | 9.6841          |
| 120        | 9.7667       | 9.6391          |
| 130        | 9.7728       | 9.6637          |
| 140        | 9.7767       | 9.6289          |
| 150        | 9.7804       | 9.6610          |
| 160        | 9.7854       | 9.7246          |
| 170        | 9.7911       | 9.6801          |
| 180        | 9.7992       | 9.6954          |
| 190        | 9.8002       | 9.6630          |
| 200        | 9.8007       | 9.6746          |

**Table S3.** Evolution of best fitness and average fitness (in eV) in each generation of Mg-Nd alloys optimized by using the GAEAM package and improved genetic algorithm developed in this work interfaced with the LAMMPS (19 Nov 2024) package.

| Generation | Best fitness | Average fitness |
|------------|--------------|-----------------|
| 10         | 8.9631       | 8.1939          |
| 20         | 9.0947       | 8.7713          |
| 30         | 9.1504       | 8.9145          |
| 40         | 9.3156       | 9.0633          |
| 50         | 9.4774       | 9.2568          |
| 60         | 9.5718       | 9.3980          |
| 70         | 9.6375       | 9.4773          |
| 80         | 9.6705       | 9.5347          |
| 90         | 9.6827       | 9.4677          |
| 100        | 9.6946       | 9.5805          |
| 110        | 9.7183       | 9.5444          |
| 120        | 9.7245       | 9.6460          |
| 130        | 9.7329       | 9.6120          |
| 140        | 9.7368       | 9.6338          |
| 150        | 9.7493       | 9.6376          |
| 160        | 9.7516       | 9.6565          |
| 170        | 9.7520       | 9.6496          |
| 180        | 9.7530       | 9.6641          |
| 190        | 9.7547       | 9.6374          |
| 200        | 9.7565       | 9.6201          |

**Table S4.** Evolution of best fitness and average fitness (in eV) in each generation of Sc-Al alloys optimized by using the GAEAM package and improved genetic algorithm developed in this work interfaced with the LAMMPS (19 Nov 2024) package.

| Generation | Best fitness | Average fitness |
|------------|--------------|-----------------|
| 10         | 8.7188       | 8.0280          |
| 20         | 8.8084       | 8.4494          |
| 30         | 8.9250       | 8.7343          |
| 40         | 9.0914       | 8.8802          |
| 50         | 9.1767       | 8.9908          |
| 60         | 9.2451       | 9.0517          |
| 70         | 9.3432       | 9.1902          |
| 80         | 9.4438       | 9.2825          |
| 90         | 9.5003       | 9.3123          |
| 100        | 9.5473       | 9.4301          |
| 110        | 9.5624       | 9.4796          |
| 120        | 9.5783       | 9.4727          |
| 130        | 9.6030       | 9.4900          |
| 140        | 9.6107       | 9.5075          |
| 150        | 9.6212       | 9.4687          |
| 160        | 9.6245       | 9.5057          |
| 170        | 9.6278       | 9.5435          |
| 180        | 9.6359       | 9.5950          |
| 190        | 9.6424       | 9.5538          |
| 200        | 9.6465       | 9.5559          |

**Table S5.** Evolution of best fitness and average fitness (in eV) in each generation of Sm-Co alloys optimized by using the GAEAM package and improved genetic algorithm developed in this work interfaced with the LAMMPS (19 Nov 2024) package.

| Generation | Best fitness | Average fitness |
|------------|--------------|-----------------|
| 10         | 8.3826       | 7.6913          |
| 20         | 8.7447       | 8.3438          |
| 30         | 9.0198       | 8.6507          |
| 40         | 9.1348       | 8.9489          |
| 50         | 9.2625       | 9.0829          |
| 60         | 9.4528       | 9.1844          |
| 70         | 9.5261       | 9.3395          |
| 80         | 9.6330       | 9.4715          |
| 90         | 9.6610       | 9.5473          |
| 100        | 9.7137       | 9.5956          |
| 110        | 9.7230       | 9.5941          |
| 120        | 9.7333       | 9.6131          |
| 130        | 9.7416       | 9.5872          |
| 140        | 9.7520       | 9.6511          |
| 150        | 9.7551       | 9.6766          |
| 160        | 9.7603       | 9.7021          |
| 170        | 9.7614       | 9.7072          |
| 180        | 9.7620       | 9.6399          |
| 190        | 9.7634       | 9.6249          |
| 200        | 9.7642       | 9.6910          |

## Part D. Cartesian coordinates of selected solids

**Table S6.** Geometrical structures of selected solids including the AlCu, MgNd, ScAl<sub>3</sub>, Al<sub>2</sub>Sm and SmCo<sub>5</sub> crystals obtained from the Database of Materials Project and Materials Springer.

| AlCu                             |             |
|----------------------------------|-------------|
| data_AlCu                        |             |
| _symmetry_space_group_name_H-M   | 'P 1'       |
| _cell_length_a                   | 2.99750900  |
| _cell_length_b                   | 2.99750900  |
| _cell_length_c                   | 2.99750900  |
| _cell_angle_alpha                | 90.00000000 |
| _cell_angle_beta                 | 90.00000000 |
| _cell_angle_gamma                | 90.00000000 |
| _symmetry_Int_Tables_number      | 1           |
| _chemical_formula_structural     | AlCu        |
| _chemical_formula_sum            | 'Al1 Cu1'   |
| _cell_volume                     | 26.93279883 |
| _cell_formula_units_Z            | 1           |
| loop_                            |             |
| _symmetry_equiv_pos_site_id      |             |
| _symmetry_equiv_pos_as_xyz       |             |
| 1                                | 'x, y, z'   |
| loop_                            |             |
| _atom_site_type_symbol           |             |
| _atom_site_label                 |             |
| _atom_site_symmetry_multiplicity |             |
| _atom_site_fract_x               |             |
| _atom_site_fract_y               |             |
| _atom_site_fract_z               |             |
| _atom_site_occupancy             |             |

|    |     |   |            |            |            |   |
|----|-----|---|------------|------------|------------|---|
| Al | Al0 | 1 | 0.00000000 | 0.00000000 | 0.00000000 | 1 |
| Cu | Cu1 | 1 | 0.50000000 | 0.50000000 | 0.50000000 | 1 |

### MgNd

data\_sm\_isp\_SD0250273-standardized\_unitcell

#### #Cell Parameters

|                                |         |
|--------------------------------|---------|
| _cell_length_a                 | 3.881   |
| _cell_length_b                 | 3.881   |
| _cell_length_c                 | 3.881   |
| _cell_angle_alpha              | 90      |
| _cell_angle_beta               | 90      |
| _cell_angle_gamma              | 90      |
| _sm_length_ratio_ab            | 1.000   |
| _sm_length_ratio_bc            | 1.000   |
| _sm_length_ratio_ca            | 1.000   |
| _cell_volume                   | 58.46   |
| _symmetry_space_group_name_H-M | 'Pm-3m' |
| _symmetry_Int_Tables_number    | 221     |
| _cell_formula_units_Z          | 1       |
| _sm_cell_transformation        |         |

;No transformation from published to standardized cell parameters necessary.

;

#### #Atom Coordinates

loop\_

|                           |
|---------------------------|
| _atom_site_label          |
| _atom_site_type_symbol    |
| _atom_site_Wyckoff_symbol |
| _sm_site_symmetry         |
| _atom_site_fract_x        |

```

_atom_site_fract_y
_atom_site_fract_z
_atom_site_occupancy
_sm_coordination_number
_sm_atomic_environment_type
Nd 'Nd' .1b .m-3m 0.5 0.5 0.5 1 14 'rhombohedral dodecahedron, Mg<sub>8</sub>Nd<sub>6</sub>'
Mg 'Mg' .1a .m-3m 0 0 0 1 14 'rhombohedral dodecahedron, Nd<sub>8</sub>Mg<sub>6</sub>'

```

### ScAl<sub>3</sub>

```

data_ScAl3
_symmetry_space_group_name_H-M 'P 1'
_cell_length_a 4.10727700
_cell_length_b 4.10727700
_cell_length_c 4.10727700
_cell_angle_alpha 90.00000000
_cell_angle_beta 90.00000000
_cell_angle_gamma 90.00000000
_symmetry_Int_Tables_number 1
_chemical_formula_structural ScAl3
_chemical_formula_sum 'Sc1 Al3'
_cell_volume 69.28863084
_cell_formula_units_Z 1
loop_
_symmetry_equiv_pos_site_id
_symmetry_equiv_pos_as_xyz
1 'x, y, z'
loop_
_atom_site_type_symbol
_atom_site_label
_atom_site_symmetry_multiplicity

```

```

_atom_site_fract_x
_atom_site_fract_y
_atom_site_fract_z
_atom_site_occupancy
Sc Sc0 1 0.00000000 0.00000000 0.00000000 1
Al Al1 1 0.50000000 0.00000000 0.50000000 1
Al Al2 1 0.00000000 0.50000000 0.50000000 1
Al Al3 1 0.50000000 0.50000000 0.00000000 1

```

Al<sub>2</sub>Sm

#-----

# CRYSTAL DATA

#-----

data\_VESTA\_phase\_1

\_chemical\_name\_common 'sm\_isp\_SD0250345-standardized\_unitcell'

\_cell\_length\_a 7.941800

\_cell\_length\_b 7.941800

\_cell\_length\_c 7.941800

\_cell\_angle\_alpha 90.000000

\_cell\_angle\_beta 90.000000

\_cell\_angle\_gamma 90.000000

\_cell\_volume 500.906719

\_space\_group\_name\_H-M\_alt 'F d -3 m'

\_space\_group\_IT\_number 227

loop\_

\_space\_group\_symop\_operation\_xyz

'x, y, z'

'-x, -y, -z'  
 '-x+3/4, -y+1/4, z+1/2'  
 'x+1/4, y+3/4, -z+1/2'  
 '-x+1/4, y+1/2, -z+3/4'  
 'x+3/4, -y+1/2, z+1/4'  
 'x+1/2, -y+3/4, -z+1/4'  
 '-x+1/2, y+1/4, z+3/4'  
 'z, x, y'  
 '-z, -x, -y'  
 'z+1/2, -x+3/4, -y+1/4'  
 '-z+1/2, x+1/4, y+3/4'  
 '-z+3/4, -x+1/4, y+1/2'  
 'z+1/4, x+3/4, -y+1/2'  
 '-z+1/4, x+1/2, -y+3/4'  
 'z+3/4, -x+1/2, y+1/4'  
 'y, z, x'  
 '-y, -z, -x'  
 '-y+1/4, z+1/2, -x+3/4'  
 'y+3/4, -z+1/2, x+1/4'  
 'y+1/2, -z+3/4, -x+1/4'  
 '-y+1/2, z+1/4, x+3/4'  
 '-y+3/4, -z+1/4, x+1/2'  
 'y+1/4, z+3/4, -x+1/2'  
 'y+3/4, x+1/4, -z+1/2'  
 '-y+1/4, -x+3/4, z+1/2'  
 '-y, -x, -z'  
 'y, x, z'  
 'y+1/4, -x+1/2, z+3/4'  
 '-y+3/4, x+1/2, -z+1/4'

'-y+1/2, x+3/4, z+1/4'  
 'y+1/2, -x+1/4, -z+3/4'  
 'x+3/4, z+1/4, -y+1/2'  
 '-x+1/4, -z+3/4, y+1/2'  
 '-x+1/2, z+3/4, y+1/4'  
 'x+1/2, -z+1/4, -y+3/4'  
 '-x, -z, -y'  
 'x, z, y'  
 'x+1/4, -z+1/2, y+3/4'  
 '-x+3/4, z+1/2, -y+1/4'  
 'z+3/4, y+1/4, -x+1/2'  
 '-z+1/4, -y+3/4, x+1/2'  
 'z+1/4, -y+1/2, x+3/4'  
 '-z+3/4, y+1/2, -x+1/4'  
 '-z+1/2, y+3/4, x+1/4'  
 'z+1/2, -y+1/4, -x+3/4'  
 '-z, -y, -x'  
 'z, y, x'  
 'x, y+1/2, z+1/2'  
 '-x, -y+1/2, -z+1/2'  
 '-x+3/4, -y+3/4, z'  
 'x+1/4, y+1/4, -z'  
 '-x+1/4, y, -z+1/4'  
 'x+3/4, -y, z+3/4'  
 'x+1/2, -y+1/4, -z+3/4'  
 '-x+1/2, y+3/4, z+1/4'  
 'z, x+1/2, y+1/2'  
 '-z, -x+1/2, -y+1/2'  
 'z+1/2, -x+1/4, -y+3/4'

'-z+1/2, x+3/4, y+1/4'  
 '-z+3/4, -x+3/4, y'  
 'z+1/4, x+1/4, -y'  
 '-z+1/4, x, -y+1/4'  
 'z+3/4, -x, y+3/4'  
 'y, z+1/2, x+1/2'  
 '-y, -z+1/2, -x+1/2'  
 '-y+1/4, z, -x+1/4'  
 'y+3/4, -z, x+3/4'  
 'y+1/2, -z+1/4, -x+3/4'  
 '-y+1/2, z+3/4, x+1/4'  
 '-y+3/4, -z+3/4, x'  
 'y+1/4, z+1/4, -x'  
 'y+3/4, x+3/4, -z'  
 '-y+1/4, -x+1/4, z'  
 '-y, -x+1/2, -z+1/2'  
 'y, x+1/2, z+1/2'  
 'y+1/4, -x, z+1/4'  
 '-y+3/4, x, -z+3/4'  
 '-y+1/2, x+1/4, z+3/4'  
 'y+1/2, -x+3/4, -z+1/4'  
 'x+3/4, z+3/4, -y'  
 '-x+1/4, -z+1/4, y'  
 '-x+1/2, z+1/4, y+3/4'  
 'x+1/2, -z+3/4, -y+1/4'  
 '-x, -z+1/2, -y+1/2'  
 'x, z+1/2, y+1/2'  
 'x+1/4, -z, y+1/4'  
 '-x+3/4, z, -y+3/4'

'z+3/4, y+3/4, -x'  
 '-z+1/4, -y+1/4, x'  
 'z+1/4, -y, x+1/4'  
 '-z+3/4, y, -x+3/4'  
 '-z+1/2, y+1/4, x+3/4'  
 'z+1/2, -y+3/4, -x+1/4'  
 '-z, -y+1/2, -x+1/2'  
 'z, y+1/2, x+1/2'  
 'x+1/2, y, z+1/2'  
 '-x+1/2, -y, -z+1/2'  
 '-x+1/4, -y+1/4, z'  
 'x+3/4, y+3/4, -z'  
 '-x+3/4, y+1/2, -z+1/4'  
 'x+1/4, -y+1/2, z+3/4'  
 'x, -y+3/4, -z+3/4'  
 '-x, y+1/4, z+1/4'  
 'z+1/2, x, y+1/2'  
 '-z+1/2, -x, -y+1/2'  
 'z, -x+3/4, -y+3/4'  
 '-z, x+1/4, y+1/4'  
 '-z+1/4, -x+1/4, y'  
 'z+3/4, x+3/4, -y'  
 '-z+3/4, x+1/2, -y+1/4'  
 'z+1/4, -x+1/2, y+3/4'  
 'y+1/2, z, x+1/2'  
 '-y+1/2, -z, -x+1/2'  
 '-y+3/4, z+1/2, -x+1/4'  
 'y+1/4, -z+1/2, x+3/4'  
 'y, -z+3/4, -x+3/4'

'-y, z+1/4, x+1/4'  
 '-y+1/4, -z+1/4, x'  
 'y+3/4, z+3/4, -x'  
 'y+1/4, x+1/4, -z'  
 '-y+3/4, -x+3/4, z'  
 '-y+1/2, -x, -z+1/2'  
 'y+1/2, x, z+1/2'  
 'y+3/4, -x+1/2, z+1/4'  
 '-y+1/4, x+1/2, -z+3/4'  
 '-y, x+3/4, z+3/4'  
 'y, -x+1/4, -z+1/4'  
 'x+1/4, z+1/4, -y'  
 '-x+3/4, -z+3/4, y'  
 '-x, z+3/4, y+3/4'  
 'x, -z+1/4, -y+1/4'  
 '-x+1/2, -z, -y+1/2'  
 'x+1/2, z, y+1/2'  
 'x+3/4, -z+1/2, y+1/4'  
 '-x+1/4, z+1/2, -y+3/4'  
 'z+1/4, y+1/4, -x'  
 '-z+3/4, -y+3/4, x'  
 'z+3/4, -y+1/2, x+1/4'  
 '-z+1/4, y+1/2, -x+3/4'  
 '-z, y+3/4, x+3/4'  
 'z, -y+1/4, -x+1/4'  
 '-z+1/2, -y, -x+1/2'  
 'z+1/2, y, x+1/2'  
 'x+1/2, y+1/2, z'  
 '-x+1/2, -y+1/2, -z'

'-x+1/4, -y+3/4, z+1/2'  
 'x+3/4, y+1/4, -z+1/2'  
 '-x+3/4, y, -z+3/4'  
 'x+1/4, -y, z+1/4'  
 'x, -y+1/4, -z+1/4'  
 '-x, y+3/4, z+3/4'  
 'z+1/2, x+1/2, y'  
 '-z+1/2, -x+1/2, -y'  
 'z, -x+1/4, -y+1/4'  
 '-z, x+3/4, y+3/4'  
 '-z+1/4, -x+3/4, y+1/2'  
 'z+3/4, x+1/4, -y+1/2'  
 '-z+3/4, x, -y+3/4'  
 'z+1/4, -x, y+1/4'  
 'y+1/2, z+1/2, x'  
 '-y+1/2, -z+1/2, -x'  
 '-y+3/4, z, -x+3/4'  
 'y+1/4, -z, x+1/4'  
 'y, -z+1/4, -x+1/4'  
 '-y, z+3/4, x+3/4'  
 '-y+1/4, -z+3/4, x+1/2'  
 'y+3/4, z+1/4, -x+1/2'  
 'y+1/4, x+3/4, -z+1/2'  
 '-y+3/4, -x+1/4, z+1/2'  
 '-y+1/2, -x+1/2, -z'  
 'y+1/2, x+1/2, z'  
 'y+3/4, -x, z+3/4'  
 '-y+1/4, x, -z+1/4'  
 '-y, x+1/4, z+1/4'

'y, -x+3/4, -z+3/4'  
 'x+1/4, z+3/4, -y+1/2'  
 '-x+3/4, -z+1/4, y+1/2'  
 '-x, z+1/4, y+1/4'  
 'x, -z+3/4, -y+3/4'  
 '-x+1/2, -z+1/2, -y'  
 'x+1/2, z+1/2, y'  
 'x+3/4, -z, y+3/4'  
 '-x+1/4, z, -y+1/4'  
 'z+1/4, y+3/4, -x+1/2'  
 '-z+3/4, -y+1/4, x+1/2'  
 'z+3/4, -y, x+3/4'  
 '-z+1/4, y, -x+1/4'  
 '-z, y+1/4, x+1/4'  
 'z, -y+3/4, -x+3/4'  
 '-z+1/2, -y+1/2, -x'  
 'z+1/2, y+1/2, x'

loop\_

\_atom\_site\_label

\_atom\_site\_occupancy

\_atom\_site\_fract\_x

\_atom\_site\_fract\_y

\_atom\_site\_fract\_z

\_atom\_site\_adp\_type

\_atom\_site\_U\_iso\_or\_equiv

\_atom\_site\_type\_symbol

|    |     |          |          |          |      |      |
|----|-----|----------|----------|----------|------|------|
| Al | 1.0 | 0.000000 | 0.000000 | 0.000000 | Uiso | ? Al |
| Sm | 1.0 | 0.375000 | 0.375000 | 0.375000 | Uiso | ? Sm |

SmCo<sub>5</sub>

## data\_SmCo5

\_symmetry\_space\_group\_name\_H-M 'P 1'

\_cell\_length\_a 4.96798097

\_cell\_length\_b 4.96798097

\_cell\_length\_c 3.96287000

\_cell\_angle\_alpha 90.00000000

\_cell\_angle\_beta 90.00000000

\_cell\_angle\_gamma 120.00001285

\_symmetry\_Int\_Tables\_number 1

\_chemical\_formula\_structural SmCo5

\_chemical\_formula\_sum 'Sm1 Co5'

\_cell\_volume 84.70328381

\_cell\_formula\_units\_Z 1

## loop\_

\_symmetry\_equiv\_pos\_site\_id

\_symmetry\_equiv\_pos\_as\_xyz

1 'x, y, z'

## loop\_

\_atom\_site\_type\_symbol

\_atom\_site\_label

\_atom\_site\_symmetry\_multiplicity

\_atom\_site\_fract\_x

\_atom\_site\_fract\_y

\_atom\_site\_fract\_z

\_atom\_site\_occupancy

Sm Sm0 1 0.00000000 0.00000000 0.00000000 1

Co Co1 1 0.66666700 0.33333300 0.00000000 1

Co Co2 1 0.33333300 0.66666700 0.00000000 1

|    |     |   |            |            |            |   |
|----|-----|---|------------|------------|------------|---|
| Co | Co3 | 1 | 0.50000000 | 0.50000000 | 0.50000000 | 1 |
| Co | Co4 | 1 | 0.50000000 | 0.00000000 | 0.50000000 | 1 |
| Co | Co5 | 1 | 0.00000000 | 0.50000000 | 0.50000000 | 1 |

## Part E. Complete user guide for the usage of GAEAM package

**Table S7.** Usage procedures and a clear description of how to implement and use the package.

### Input structure:

- Input file 1: Alloy crystal structure file (POSCAR/CIF format, from Materials Project).
- Input file 2: Parameter range configuration file (JSON format, defining upper/lower limits of EAM parameters).
- Input file 3: GA hyperparameter file (population size, crossover rate, mutation rate, generation number).

### Output structure:

- Output file 1: Optimized EAM potential file (.eam.alloy format, compatible with LAMMPS).
- Output file 2: GA evolution report (fitness change curve, optimal parameter list).
- Output file 3: MD simulation result file (RDF, CN, RMSD, energy data).

### Usage procedure:

Step 1: Configure input files and set alloy system parameters.

Step 2: Run the main Python script of GAEAM to start automatic optimization.

Step 3: Wait for GA convergence and obtain the final EAM potential.

Step 4: Call LAMMPS for MD simulation using the optimized potential.

## Part F. Optimized parameters for EAM potentials

**Table S8.** Optimized parameters for EAM potentials for different selected alloys (AlCu, MgNd, ScAl<sub>3</sub>, Al<sub>2</sub>Sm, and SmCo<sub>5</sub>) in this work by using the GAEAM package.

|                                                                                                                                                                                                                                                                                                                                                                                                                                 |
|---------------------------------------------------------------------------------------------------------------------------------------------------------------------------------------------------------------------------------------------------------------------------------------------------------------------------------------------------------------------------------------------------------------------------------|
| AlCu                                                                                                                                                                                                                                                                                                                                                                                                                            |
| Best parameters: [3.178956, 1.557458, 6.547033, 3.491751, 0.311724, 0.405762, 0.376048, 0.841896, 21.482392, 25.747271, -2.779526, -0.298421, 1.307284, -1.235128, -2.8017, 0.0, 0.634934, -2.585016, 0.786316, -3.118954, 2.5306, 1.53894, 9.021658, 4.291384, 0.392654, 0.608374, 0.305694, 0.839732, 23.147772, 23.504688, -2.216616, -0.26115, 1.098368, -0.809427, -2.1681, 0.0, 0.598997, -2.079589, 0.307385, -2.404475] |
| MgNd                                                                                                                                                                                                                                                                                                                                                                                                                            |
| Best parameters: [3.178956, 1.557458, 6.547033, 3.491751, 0.311724, 0.405762, 0.376048, 0.843258, 21.416061, 25.747271, -2.779526, -0.298421, 1.373873, -1.235128, -2.8017, 0.0, 0.647122, -2.463362, 0.846925, -3.103126, 2.5306, 1.53894, 9.021658, 4.291384, 0.392654, 0.608374, 0.312094, 0.839732, 21.365999, 23.504688, -2.148566, -0.26115, 1.159177, -0.809427, -2.1681, 0.0, 0.591995, -2.079589, 0.310066, -2.402993] |
| ScAl <sub>3</sub>                                                                                                                                                                                                                                                                                                                                                                                                               |
| Best parameters: [3.178956, 1.557458, 6.547033, 3.491751, 0.311724, 0.405762, 0.376048, 0.843258, 20.792432, 25.747271, -2.779526, -0.298421, 1.247973, -1.235128, -2.8017, 0.0,                                                                                                                                                                                                                                                |

0.658215, -2.463362, 0.817622, -2.986848, 2.5306, 1.53894, 9.021658, 4.291384, 0.392654,  
0.608374, 0.336951, 0.839732, 22.445078, 23.156701, -2.148566, -0.26115, 1.146025, -0.809427,  
-2.1681, 0.0, 0.609773, -2.079589, 0.307385, -2.415509]

Al<sub>2</sub>Sm

Best parameters: [3.178956, 1.557458, 6.547033, 3.491751, 0.311724, 0.405762, 0.376048,  
0.843258, 20.680891, 25.747271, -2.779526, -0.298421, 1.329601, -1.235128, -2.8017, 0.0,  
0.657049, -2.463362, 0.813513, -3.12561, 2.5306, 1.53894, 9.021658, 4.291384, 0.392654,  
0.608374, 0.305694, 0.839732, 21.756382, 23.504688, -2.148566, -0.26115, 1.20503, -0.892376,  
-2.1681, 0.0, 0.556212, -2.079589, 0.307385, -2.420449]

SmCo<sub>5</sub>

Best parameters: [3.178956, 1.557458, 6.547033, 3.491751, 0.311724, 0.405762, 0.376048,  
0.843258, 21.440862, 25.747271, -2.779526, -0.324667, 1.397004, -1.304151, -2.8017, 0.0,  
0.660743, -2.463362, 0.778043, -3.101124, 2.5306, 1.53894, 9.021658, 4.291384, 0.392654,  
0.608374, 0.305694, 0.839732, 22.503494, 22.939174, -2.148566, -0.26115, 1.120768, -0.809427,  
-2.1681, 0.0, 0.574564, -2.079589, 0.307385, -2.407977]

## Part G. Reported parameters for EAM potentials

**Table S9.** Reported optimized parameters for EAM potentials for AlCu alloys obtained from the Interatomic Potentials Repository-NIST at <https://www.ctcms.nist.gov/potentials/>.

| Parameter | Cu        | Al        |
|-----------|-----------|-----------|
| $r_e$     | 2.556162  | 2.863924  |
| $f_e$     | 1.554485  | 1.403115  |
| $\rho_e$  | 21.175871 | 20.418205 |
| $\rho_s$  | 21.175395 | 23.195740 |
| $\gamma$  | 8.127620  | 6.613165  |
| $\omega$  | 4.334731  | 3.527021  |
| $A$       | 0.396620  | 0.314873  |
| $B$       | 0.548085  | 0.365551  |
| $\kappa$  | 0.308782  | 0.379846  |
| $\lambda$ | 0.756515  | 0.759692  |
| $F_{n0}$  | -2.170269 | -2.807602 |
| $F_{n1}$  | -0.263788 | -0.301435 |
| $F_{n2}$  | 1.088878  | 1.258562  |
| $F_{n3}$  | -0.817603 | -1.247604 |
| $F_0$     | -2.19     | -2.83     |
| $F_1$     | 0         | 0         |
| $F_2$     | 0.561830  | 0.622245  |
| $F_3$     | -2.100595 | -2.488244 |
| $\eta$    | 0.310490  | 0.785902  |
| $F_e$     | -2.186568 | -2.824528 |
